# Supplementary material for: ScFT6: A Putative Candidate for Sugarcane Floral Inducer
Source: Research Square preprint supplement (doi:10.21203/rs.3.rs-614514/v1), 2021-06-16
Supplement: Supplementary file 1 [file e1fe3f23c1698ce62d1c1d04.docx]

# Supp. Figure 1

Inductive photoperiod

Non-inductive photoperiod
